1     **Maternal RND3/RhoE deficiency impairs placental mitochondrial function in**  
2     **preeclampsia by modulating PPAR $\gamma$ -UCP2 cascade**

3

4     Liping Huang<sup>1 †</sup>, Yanlin Ma<sup>2 †</sup>, Lu Chen<sup>1</sup>, Jiang Chang<sup>3</sup>, Mei Zhong<sup>1</sup>, Zhijian Wang<sup>1</sup>,  
5     Ying Sun<sup>4</sup>, Xia Chen<sup>1</sup>, Fei Sun<sup>1</sup>, Lu Xiao<sup>1</sup>, Jianing Chen<sup>1</sup>, Yinjun Lai<sup>1</sup>, Chuming Yan<sup>1</sup>,  
6     Xiaojing Yue<sup>1 \*</sup>

7

8     1. Department of Obstetrics and Gynecology, Nanfang Hospital, Southern Medical University,  
9     Guangzhou, China.

10    2. Hainan Provincial Key Laboratory for Human Reproductive Medicine and Genetic Research,  
11    Reproductive Medical Center, The First Affiliated Hospital of Hainan Medical University,  
12    Hainan Medical University, Haikou, China

13    3. Institute of Biosciences and Technology, Texas A&M University Health Science Center,  
14    Houston, US.

15    4. Department of Obstetrics and Gynecology, Affiliated Shenzhen Maternity and Child Healthcare  
16    Hospital, Southern Medical University, Shenzhen, China

17

18    **Running title:** Rnd3 regulates mitochondria in preeclampsia

19

20    **\*Correspondence to:** Xiaojing Yue, PhD (yuexj1986@163.com);

21    **Phone:** (86) 020-62787551

22    Mailing address: Southern Medical University, 1023 South Shatai Rd, Guangzhou 510515, China.

23

24    †These authors contributed equally to this work.

25

26    **Word count**

27    **Abstract: 229 words**

28    **Article length: 3880 words**

29

30

31

32

33

34

35

36

37 **Abstract**

38 Preeclampsia (PE) is a life-threatening disease of the pregnant women, and has a  
39 profound influence on fetal development. Mitochondrial-mediated placental oxidative  
40 stress plays key role in the etiology of PE. However, the underlying mechanism remains  
41 to be revealed. Here, we identify Rnd3, a small Rho GTPase, participating in the  
42 regulation of placental mitochondrial reactive oxygen species (ROS). We showed that  
43 Rnd3 is down-regulated in primary trophoblasts isolated from PE patients. Loss of  
44 Rnd3 in trophoblasts resulted in excessive ROS generation, cell apoptosis,  
45 mitochondrial injury and proton leakage from respiratory chain. Moreover, Rnd3  
46 overexpression partially rescues the mitochondrial defects and oxidative stress in  
47 human PE primary trophoblasts. Mechanistically, Rnd3 physically interacts with the  
48 peroxisome proliferators-activated receptor  $\gamma$  (PPAR $\gamma$ ) and promotes PPAR $\gamma$ -  
49 mitochondrial uncoupling protein 2 (UCP2) cascade. Forced expression of PPAR $\gamma$   
50 rescues deficiency of Rnd3-mediated mitochondrial dysfunction. We conclude that  
51 Rnd3 acts as a novel protective factor in placental mitochondria through  
52 PPAR $\gamma$ -UCP2 signaling and highlight that downregulation of Rnd3 is a potential  
53 factor involved in the pathogenesis of PE.

54

55 **Keywords:** Rnd3, Preeclampsia, Mitochondrion, Oxidative stress, PPAR $\gamma$

56

57

58

59

60

61

62

63

64

65

66

67

## Introduction

68 Preeclampsia (PE) is a pregnancy complication that occurs after the 20<sup>th</sup> gestational  
69 week and is characterized by maternal hypertension, proteinuria and multi-organ  
70 injuries. It affects 5-7% of pregnancies and is the leading cause of perinatal morbidity  
71 and mortality(Rana et al., 2019). Although the mechanisms responsible for the  
72 pathogenesis of PE have not been entirely clarified, placental oxidative stress along  
73 with poor vascularization is thought to be its main cause(Hladunewich et al., 2007;  
74 Steegers et al., 2010). Oxidative stress is generated by the imbalance of reactive oxygen  
75 species (ROS) and the endogenous oxidant scavenging system(Birben et al., 2012).  
76 Excessive ROS accumulation is identified in PE pathogenesis as the contributor to  
77 endothelial dysfunction and placental inflammation response(Myatt, 2010; San Juan-  
78 Reyes et al., 2020; Sanchez-Aranguren et al., 2014). Although shallow invasion of  
79 trophoblasts to decidua and subsequent failed spiral artery remodeling participate in  
80 placental ischemia and oxidative stress, accumulating evidence has shown that  
81 mitochondrial dysfunction during PE also can induce an increase in the level of ROS  
82 and cause placental oxidative stress(D'Souza et al., 2016; Vishnyakova et al., 2016;  
83 Wang and Walsh, 1998). Abnormalities in the morphology of mitochondria, including  
84 swelling mass and disappearance of cristae, have been observed in trophoblasts of PE  
85 placenta(Salgado and Salgado, 2011). However, a limited number of studies have  
86 investigated the molecular machinery of the mitochondrial ROS during PE.

87

88 Peroxisome proliferators-activated receptor  $\gamma$  (PPAR $\gamma$ ) is a ligand-inducible  
89 transcription factor that plays key roles in mitochondrial biogenesis, dynamics and  
90 metabolism(Corona and Duchon, 2016; Janani and Ranjitha Kumari, 2015). Loss of  
91 PPAR $\gamma$  in a mouse model caused embryonic lethality with major placental  
92 defects(Waite et al., 2005), due to its key roles in placental vasculature and the  
93 differentiation of complicated trophoblast lineages(Barak et al., 2002; Barak et al., 1999;  
94 Schaiff et al., 2000). Recent studies have revealed that the levels of the circulating  
95 agonists of PPAR $\gamma$  were significantly reduced in PE patients(Waite et al., 2005; Waite

96 et al., 2000), while administration of rosiglitazone, a selective PPAR $\gamma$  agonist, could  
97 largely ameliorate PE in a RUPP-induced PE rat model(McCarthy et al., 2011).  
98 Nevertheless, the regulatory mechanism of the downregulated PPAR $\gamma$  signaling in PE  
99 remains unknown.

100

101 Rnd3 is a small GTPase, also called RhoE that exhibits multiple regulatory functions  
102 in carcinogenesis, cardiovascular diseases and neural development(Dai et al., 2019; Lin  
103 et al., 2013; Liu et al., 2015; Yang et al., 2015; Yue et al., 2016; Yue et al., 2014). *Rnd3*  
104 has been proposed to be a PE candidate gene based on a population study. A specific  
105 *Rnd3* SNP (rs115015150) was associated with PE and several quantitative  
106 cardiovascular risk traits(Moses et al., 2012). Several research works illustrated that  
107 Rnd3 was involved with PE and regulating the proliferation, migration and invasion of  
108 trophoblast cells(Fang et al., 2018; Xu et al., 2017; Xu et al., 2018). In the present study,  
109 we identified decreases of Rnd3 expression in placentae and primary trophoblasts from  
110 PE patients, and indicated a novel protective role of Rnd3 in PE via maintaining  
111 mitochondrial function. The possible molecular mechanism is that RND3 protein  
112 physically interacts with and stabilizes PPAR $\gamma$ . Transcriptionally regulated by PPAR $\gamma$ ,  
113 uncoupling protein 2 (UCP2) was involved in the regulation of mitochondrial  
114 membrane potential and ROS generation. The downregulated PPAR $\gamma$ -UCP2 cascade  
115 was identified and could be reversed by Rnd3 overexpression along with rescued  
116 mitochondrial dysfunction in human PE primary placental trophoblasts. The findings  
117 revealed a new function of Rnd3 in PE, and provided new insights into PE aetiology.

118

119

## Methods

### 120 Human placental tissues

121 Human placental tissues were obtained and used for the present study with written  
122 patient-informed consent and approval by the Ethics Committee of Southern Hospital,  
123 Southern Medical University. PE placental tissues were obtained from 24 patients with  
124 a terminated pregnancy with the average gestational ages  $36.1 \pm 2.8$  weeks. The healthy  
125 placental tissues were obtained from 30 spontaneous term pregnancies with the average

126 gestational ages  $37.0 \pm 1.2$  weeks. Freshly harvested tissues were immediately frozen  
127 by liquid nitrogen or processed by paraformaldehyde fixation and frozen embedding.  
128 Women with a history of smoking and drinking or with a diagnosis of chronic  
129 hypertension or gestational diabetes mellitus were excluded from the present study.  
130 There was no any difference in medications or management of preeclampsia.

131

### 132 **Electron microscopy analysis**

133 Freshly harvested placental tissues were fixed with a buffer containing 2.5%  
134 glutaraldehyde (diluted from 25% glutaraldehyde, G5882, Sigma-Aldrich, USA) and  
135 were subsequently processed and embedded in LX-112 medium. The ultrathin sections  
136 were stained with uranyl acetate and lead citrate and examined in a H-7650 transmission  
137 electron microscope (HITACH, Japan).

138

### 139 **Isolation of human primary trophoblasts**

140 The isolation of human primary trophoblasts was performed as described  
141 previously(Yue et al., 2018). Briefly, the fresh placental tissues were dissected into  
142 small pieces and were washed with PBS to remove blood cells. Digestion with the  
143 media containing 0.125% trypsin (diluted from 0.25% Trypsin-EDTA, Gibco 25200072,  
144 USA), 0.03% DNase (D4263, Sigma-Aldrich, USA) and 1% Penicillin-Streptomycin  
145 was performed at 37°C. Floating cells with trypsin supernatant were neutralized by 5%  
146 fetal bovine serum (FBS). Following 5 times of digestion, the total number of cells was  
147 harvested by centrifugation at 1,200 x g for 15 min and resuspended in DMEM medium.  
148 The trophoblast cells were purified with 5-65% Percoll density gradients (P1644-500  
149 ml, Sigma, USA). The cell surface biomarker cytokeratin 7 (CK7) was used to identify  
150 the trophoblasts. A total of 20 immunofluorescent staining images were acquired in  
151 different fields by fluorescence microscopy. The numbers of CK7 positive cells and  
152 DAPI-labeled nuclei in each image were counted by the LAS V4.0 software. The purity  
153 of the trophoblasts was determined by the ratio of the number of CK7 positive cells  
154 over that of the total cells.

155

## 156 **Cell culture and hypoxia treatment**

157 Human primary trophoblasts were cultured in RPMI-1640 medium containing 10%  
158 fetal bovine serum (FBS) and 1% Penicillin-Streptomycin. BeWo cells (ATCC CCL-  
159 98, USA) were cultured in F-12K medium containing 2 mM Glutamine, 10% FBS and  
160 1% Penicillin-Streptomycin. The cells were maintained at 37°C with 5% CO<sub>2</sub>. Hypoxic  
161 cell culture was performed in a hypoxic chamber (MIC-101, Billups-Rothenberg Inc,  
162 CA, USA) with 1% O<sub>2</sub> for 16 h.

163

## 164 **Expression vectors and adenoviral expression vectors**

165 The subcloning of human *Rnd3* cDNA was performed to generate the expression  
166 vectors GFP-RND3 and Myc-RND3 as described previously(Dai et al., 2019; Yue et  
167 al., 2016). Human PPAR $\gamma$  cDNA was subcloned into GV141 backbone (GeneChem,  
168 Shanghai, China) to generate the expression vector Flag-PPAR $\gamma$ . The AdMax<sup>TM</sup> system  
169 was used for the generation of recombinant adenovirus carrying human *Rnd3* cDNA.  
170 Briefly, CMV-EGFP-Rnd3 and viral backbone plasmid pBHG were co-transfected into  
171 HEK293 cells and subsequently the recombinant adenovirus was harvested and  
172 amplified in HEK293 cells.

173

## 174 **Mitochondrial respiratory function measurement**

175 Mitochondrial respiration was measured at 37°C in a Seahorse XF24 Extracellular Flux  
176 Analyzer (Agilent, USA). The XF Cell Mito Stress Test Kit (103015-100, Agilent, USA)  
177 and XF24 FluxPak mini (102342-100, Agilent, USA) were used to determine  
178 mitochondrial oxygen consumption rates (OCR) in viable cells. The mitochondrial  
179 assay medium consisted of XF Base Medium (102353-100, Agilent, USA), 10 mM  
180 glucose, 5 mM sodium pyruvate and 2 mM L-glutamine at pH 7.4. The OCRs were  
181 measured by subsequent addition of 2  $\mu$ M oligomycin, 1  $\mu$ M FCCP and 1  $\mu$ M antimycin  
182 A/1  $\mu$ M rotenone.

183

## 184 **Reverse transcription and quantitative PCR**

185 The mRNA transcripts were quantified by quantitative PCR analysis as described

186 previously(Yue et al., 2016). Total RNA was prepared by TRIzol extraction. The  
187 forward and reverse PCR primers (5' to 3') were as follows: *RND3* (human):  
188 CCAGCCAGAAATTATCCAGCA/GAGAACCCGAAGTGTCCCA; *GAPDH*  
189 (human): GAGTCAACGGATTTGGTTCGT/TTGATTTTGGAGGGATCTCG; *PPAR $\gamma$*   
190 (human): TCCACATTACGAAGACATTCCA/CGACATTCAATTGCCATGAG;  
191 *UCP2* (human): TGGGTTCAAGGCCACAGATG/CCATTGTAGAGGCTTCGGGG;  
192 *PGC1 $\alpha$*  (human):  
193 AGCACTTCGGTCATCCCAG/CAGTTTATCACTTTCATCTTCGC; *NRF1* (human):  
194 ATGGAGGAACACGGAGTGAC/TCATCAGCTGCTGTGGAGTT; *TFAM* (human):  
195 CCGAGGTGGTTTTTCATCTGT/CCGCCCTATAAGCATCTTGA; *PPAR $\alpha$*  (human):  
196 CTGTCTGCTCTGTGGACTCA/AGAACTATCCTCGCCGATGG; *SOD1* (human):  
197 TGAAGGTGTGGGGAAGCATT/GTCACATTGCCCAAGTCTCC; *SOD2* (human):  
198 TTTTGGGGTATCTGGGCTCC/TCAAAGGAACCAAAGTCACGT. *GAPDH*  
199 expression levels were used for qPCR normalization. The expression levels were  
200 determined by the  $2^{-\Delta\Delta C_t}$  threshold cycle method.

201

## 202 **Luciferase assay**

203 The luciferase reporter vector with the 1,000 bp promoter of the human *UCP2* gene was  
204 generated with a GV238 backbone (GeneChem, Shanghai, China). The luciferase assay  
205 was conducted as described previously(Yue et al., 2016). Each measurement was  
206 repeated three times. All results were normalized according to the co-transfected  
207 *Renilla* luciferase enzyme activity (E1910, Promega).

208

## 209 **Western immunoblotting, immunoprecipitation and ELISA**

210 The protein samples for western blot analysis were prepared as described  
211 previously(Yue et al., 2016) and the immunoblotting densitometry was quantified by  
212 the ImageJ Software (NIH, USA). For immunoprecipitation, 293T cells were co-  
213 transfected with myc-Rnd3 and flag-PPAR $\gamma$  expression vectors. The cells were lysed in  
214 RIPA lysis buffer containing protease inhibitors. Cell lysates were incubated with  
215 protein A/G magnetic beads (88802, Thermo Fisher Scientific, USA) and either mouse

216 IgG (5415S, Cell Signaling Technology, USA) or anti-Myc-Tag antibody at 4°C  
217 overnight. The beads were washed with lysis buffer for 4 times and boiled with 4X SDS  
218 loading buffer. The samples were analyzed by immunoblotting, and identified with an  
219 anti-PPAR $\gamma$  primary antibody. We used the conformation specific secondary antibody  
220 to recognize only the primary antibody but not the heavy and light chain of the antibody  
221 used for immunoprecipitation.

222

223 The antibodies used for the present study were from the following sources: anti-  
224 Cytokeratin 7 (ab9021, Abcam, USA); anti-PPAR $\gamma$  (2443S), anti-UCP2 (89326S), anti-  
225 Rnd3 (3664S), anti-Lamin B1 (12586S), anti-Myc-Tag (2276S), and mouse anti-rabbit  
226 IgG (Conformation Specific, 5127S) from Cell Signaling Technology, USA. Equal  
227 protein loading for immunoblotting was verified by the intensity of the  $\beta$ -actin blot  
228 (ab8226, Abcam, USA). 8-Isoprostane concentration was assessed by the 8-isoprostane  
229 ELISA Kit (516351, Cayman Chemical, USA).

230

### 231 **Fluorescence staining**

232 For histological analysis, fresh placental tissues were embedded in the Tissue-Tek  
233 O.C.T. Compound (4583, Sakura, USA) and frozen sections were used for  
234 dihydroethidium (DHE) staining (D1168, Thermo Fisher Scientific, USA). Cellular JC-  
235 1 (T3168, Thermo Fisher Scientific, USA) staining and DHE staining were performed  
236 with viable BeWo cells, respectively. TUNEL staining (11684795910, Roche, Germany)  
237 was performed in fixed cells for apoptosis detection.

238

### 239 **Statistical analysis**

240 The data was expressed as the mean  $\pm$  standard deviation (SD). An unpaired, two-tailed  
241 Student's *t* test was used for two-group comparison. The one-way ANOVA followed by  
242 the Student-Newman-Keuls method was used for multiple-group comparison. All  
243 analyses were conducted using GraphPad Prism 8.0. A value of  $P < 0.05$  was considered  
244 for significant difference.

245



246

## Results

### 247 **The expression of Rnd3 is downregulated in human placentae with PE**

248 To investigate the role of Rnd3 in PE, its expression levels were measured in 24 human  
249 placentae from PE patients and 30 healthy controls. Women with a history of smoking  
250 and drinking or with a diagnosis of chronic hypertension or gestational diabetes mellitus  
251 were excluded from the present study. The clinical characteristics of all pregnant  
252 women were presented in Table 1. In the placentae with PE, a 62.9% decrease was noted  
253 in the RND3 protein levels (Fig.1A) and a 46.0% decrease was noted in the *Rnd3*  
254 mRNA level (Fig. 1B). This clinical observation suggested that Rnd3 may act as a  
255 potential regulator in the pathogenesis of PE.

256

### 257 **RND3 protein expression is downregulated in human PE primary trophoblasts 258 and is associated with severe oxidative stress and apoptosis**

259 Oxidative stress is a main regulator of PE development. In the placental tissue sections,  
260 severe oxidative stress was noted in the human placentae with PE (Fig. 2A). Systemic  
261 experiments based on human primary trophoblasts (PTBs) were conducted for the  
262 understanding of the underlying mechanisms involved in this process. Human PTBs  
263 were isolated from PE and healthy placentas. The PTBs were identified by  
264 immunostaining of the surface marker cytokeratin 7 (CK7) (Fig. 2B). The purity of the  
265 isolated PTBs was 97% according to nuclear counterstaining (Fig. 2B). The protein  
266 level of RND3 in the PTBs was detected by immunostaining analysis. Rnd3 was  
267 universally expressed in the cytoplasm and nuclei of the trophoblasts (Fig 2C). Reduced  
268 Rnd3 expression was associated with increased ROS accumulation and was detected in  
269 the PE patient-derived PTBs (Fig 2C). To mimic the pathological PE placental  
270 environment, hypoxic cell culture of PTBs was established. Following induction of  
271 hypoxia, additional ROS accumulation and apoptosis were observed in the PE PTBs  
272 compared with those noted in the control PTBs (Fig 2D). This suggested that PE PTBs  
273 were more sensitive to hypoxic stress. Rnd3 may participate in the development of PE  
274 via the regulation of ROS generation.

275

276 **Human PE primary placental trophoblasts are predisposed to mitochondrial**  
277 **damage**

278 To explore the underlying mechanism of Rnd3-associated oxidative stress in PE,  
279 trophoblastic mitochondria, which are the main source of ROS, were analyzed by  
280 electron microscopy. In the ultrathin sections of the placental tissues, a borderline  
281 between the layers of syncytiotrophoblast (STB) and cytotrophoblast (CTB) could be  
282 clearly identified. In the CTB of the PE placentae, swelling mitochondria with loss of  
283 cristae were observed, which were the typical characteristics of mitochondrial damage  
284 (arrows pointed, Fig 3A). We further analyzed the mitochondrial membrane potential  
285 in PTBs. Using JC1 staining, we compared the mitochondrial membrane potential  
286 between the control PTBs and the PE PTBs with or without hypoxic stimuli. The ratios  
287 of JC1 red/green fluorescence between the two groups indicated no difference at the  
288 baseline (Fig 3B). The mitochondrial membrane potential was reduced in response to  
289 hypoxic challenge. However, the red/green fluorescence emission ratio was collapsed  
290 in PE PTBs compared with that noted in the control PTBs (Fig 3B), indicating that PE  
291 PTBs were predisposed to hypoxia-induced mitochondrial injury.

292

293 **Overexpression of Rnd3 protects the trophoblastic cells from ROS generation and**  
294 **induction of apoptosis**

295 To investigate the potential role of Rnd3 deficiency in inducing oxidative stress in PE  
296 PTBs, we manipulated Rnd3 expression in the trophoblastic BeWo cell line. Hypoxic  
297 cell culture was applied to induce ROS generation. ROS levels were determined by  
298 DHE fluorescence labeling and the detection of cellular 8-isoprostane levels. The GFP-  
299 Rnd3 expressing BeWo cells displayed significantly decreased ROS levels compared  
300 with those of the surrounding non-GFP-Rnd3 cells (Fig 4A). Consistent with these  
301 observations, myc-Rnd3 overexpression led to decreased 8-isoprostane levels (Fig 4B)  
302 and ameliorated cell apoptosis (Fig 4C-D), indicating that Rnd3 modulated the  
303 production of ROS in trophoblasts. Rnd3 deficiency was observed in human PE PTBs  
304 and may be the cause of severe oxidative stress and apoptosis in PE.

305

306 **Rnd3 deficiency leads to mitochondrial damage in BeWo trophoblastic cells**

307 To investigate if mitochondria contributed to Rnd3-mediated ROS generation, we  
308 knocked down Rnd3 in BeWo cells. Electron microscopy of Rnd3 knockdown BeWo  
309 cells revealed mitochondrial injury. The compromised mitochondria displayed a  
310 structure with damaged cristae and swelling mass (arrow pointed, Fig 5A). Consistent  
311 with the morphological changes, the mitochondrial transmembrane potential was also  
312 depolarized following Rnd3 knockdown (Fig 5B). Subsequently, the effects of Rnd3 on  
313 mitochondrial function were assessed by measuring the oxygen consumption rate (OCR)  
314 in different respiratory states. The comparison of the Rnd3 knockdown group and the  
315 control group indicated no significant differences in the OCR of the basal respiration,  
316 maximal respiration and space capacity (Fig 5C). However, a 2.4-fold increase in the  
317 proton leak associated OCR was detected in the Rnd3 knockdown BeWo cells (Fig 5C),  
318 indicating the uncoupling of ATP synthesis and substrate oxidation. Consistent with this  
319 result, the mitochondrial coupling efficiency was reduced in the siRnd3 group (Fig 5D).

320

321 **Rnd3 facilitates the protein accumulation of PPAR $\gamma$  and stimulates the expression**  
322 **of UCP2 in trophoblasts**

323 To explore the underlying mechanisms of Rnd3-mediated mitochondrial dysfunction,  
324 the mRNA expression levels of the mitochondrial regulatory factors and ROS  
325 scavengers were evaluated in siRnd3 transiently transfected BeWo cells. The analysis  
326 indicated no significant difference between siRnd3 and sicontrol groups with regard to  
327 the mRNA levels of the transcription factors *PPAR $\gamma$* , *PPAR $\gamma$*  coactivator 1- $\alpha$  (*PGC1- $\alpha$* ),  
328 peroxisome proliferator-activated receptor  $\alpha$  (*PPAR $\alpha$* ), nuclear respiratory factor 1  
329 (*NRF1*), and mitochondrial transcription factor A (*TFAM*) (Fig S1). No significant  
330 differences were also noted with regard to the levels of the endogenous ROS scavenger  
331 superoxide dismutase 1 (SOD1) and superoxide dismutase 2 (SOD2) (Fig S1).

332

333 Mitochondrial uncoupling protein 2 (UCP2) is critical for mitochondrial respiratory  
334 coupling. Rnd3 promoted the protein and the mRNA expression levels of *UCP2*,  
335 whereas knockdown of Rnd3 resulted in UCP2 deficiency (Fig 6A-6C), which was

336 consistent with the mitochondrial respiratory coupling defect in siRnd3-transfected  
337 cells. As PPAR $\gamma$  has been identified as a transcriptional regulator of UCP2 (Medvedev  
338 et al., 2001), we next assessed its expression levels. It is interesting to note that although  
339 the mRNA transcripts of PPAR $\gamma$  did not change following manipulation of *Rnd3* (Fig  
340 S1), the PPAR $\gamma$  protein expression was stimulated by myc-Rnd3 overexpression and  
341 was repressed by Rnd3 knockdown (Fig 6A-6B), suggesting a possible post-  
342 translational regulation of PPAR $\gamma$  by Rnd3.

343

#### 344 **RND3 is physically bound to PPAR $\gamma$ and results in the accumulation of PPAR $\gamma$ in** 345 **the nuclei**

346 To investigate if PPAR $\gamma$  protein could be functionally regulated by Rnd3, we knocked  
347 down and overexpressed the latter in BeWo cell cultures. As a transcription factor, the  
348 nuclear distribution of PPAR $\gamma$  is critical for maintaining its biological function. We  
349 detected apparent nuclear accumulation of PPAR $\gamma$  protein corresponding to the increase  
350 in Rnd3 expression. The opposite trend was observed when Rnd3 was knocked down  
351 (Fig 6D). Subsequently, a luciferase experiment was conducted in order to determine if  
352 Rnd3 caused any effect on its transcriptional activity. The luciferase reporter was driven  
353 by a *UCP2* promoter, which was responsible for the PPAR $\gamma$ -dependent transcriptional  
354 activity. Myc-Rnd3 overexpression resulted in a 5.2-fold increase in luciferase activity  
355 compared with that of the control, while downregulation of Rnd3 weakened PPAR $\gamma$   
356 transcriptional activity and resulted in 68% declined luciferase signal (Fig 6E). To  
357 further explore the potential mechanism of Rnd3-induced PPAR $\gamma$  protein accumulation,  
358 we performed an *in vivo* coimmunoprecipitation assay with 293T cells. As shown in  
359 Fig 6F, physical interaction between Myc-RND3 and Flag-PPAR $\gamma$  proteins was  
360 detected. Moreover, we performed co-immunostaining of these two proteins in BeWo  
361 cells and confirmed the co-localization of RND3 and PPAR $\gamma$  protein molecules and the  
362 reduced nuclear PPAR $\gamma$  protein levels in Rnd3 knockdown cells (Fig 6G).

363

#### 364 **Mitochondrial dysfunction mediated by Rnd3 deficiency is attenuated by PPAR $\gamma$** 365 **overexpression**

366 To assess whether PPAR $\gamma$  downregulation is responsible for Rnd3 deficiency-induced  
367 mitochondrial defects, Flag-PPAR $\gamma$  was overexpressed in Rnd3 knockdown BeWo cells.  
368 The improvement in mitochondrial membrane potential and mitochondrial  
369 morphological integrity was observed following PPAR $\gamma$  overexpression (Fig 7A-C).  
370 The ROS levels were detected by DHE labeling. We also detected 8-isopropane levels.  
371 PPAR $\gamma$  overexpression further ameliorated Rnd3 deficiency-mediated oxidative stress  
372 (Fig 7D-F). We analyzed the expression levels of UCP2 in Rnd3 knockdown BeWo  
373 cells with or without administration of Flag-PPAR $\gamma$ . As expected, PPAR $\gamma$  attenuated  
374 Rnd3 deficiency-induced UCP2 downregulation both at the mRNA and protein levels  
375 (Fig 7G-H). Finally, we assessed the mitochondrial respiratory functions of the different  
376 groups of BeWo cells. Overexpression of PPAR $\gamma$  significantly protected the  
377 mitochondrial function with improved proton leakage and coupler efficiency (Fig 7I-J).

378

### 379 **Adenoviral-mediated Rnd3 overexpression in human PE primary trophoblasts** 380 **rescues oxidative stress and mitochondrial defect**

381 Rnd3 downregulation was demonstrated in human PE-PTBs along with severe  
382 oxidative stress and mitochondrial injury. To further reveal the critical role of Rnd3 in  
383 the clinical pathology of PE, we overexpressed hRnd3 in human PTBs by adenoviral-  
384 mediated gene delivery. Elevated RND3 protein levels in Ad-GFP-hRnd3 treated PTBs  
385 were confirmed by western blot analysis (Fig 8D). In the absence of Ad-GFP-hRnd3  
386 infection, the baseline PE-PTBs exhibited higher ROS levels compared with those of  
387 the control-PTBs (Fig 8A, cells displaying no GFP, pointed by long arrows). Following  
388 infection with Ad-GFP-hRnd3, the ROS levels of the PE-PTBs were significantly  
389 reduced (Fig 8A, cells displaying GFP, pointed by arrow heads). The levels of 8-  
390 isopropane were decreased in PE-PTBs following Ad-GFP-hRnd3 application (Fig 8B),  
391 which was consistent with the previous observations. Increased expression levels of  
392 PPAR $\gamma$  and UCP2 were observed, as expected, in the PTBs with Ad-GFP-hRnd3 (Fig  
393 8C-D). In addition to regulating the PPAR $\gamma$ /UCP2 pathway, Rnd3 further attenuated the  
394 mitochondrial function in PE-PTBs (Fig 8E-G).

395

396 **Downregulation of the expression levels of PPAR $\gamma$  and UCP2 were observed in**  
397 **human placentae with PE**

398 The expression levels of PPAR $\gamma$  and UCP2 were evaluated in human PE placental  
399 tissues. The experiments aimed to offer additional insight in the clinical relevance of  
400 the regulation of the PPAR $\gamma$ /UCP2 pathway by Rnd3 in PE. PPAR $\gamma$  protein levels were  
401 downregulated in PE placentae. Consistent with the post-transcriptional regulation of  
402 PPAR $\gamma$  by Rnd3, the corresponding mRNA levels of *PPAR $\gamma$*  indicated no significant  
403 changes between the control and PE groups (Fig 9A-B). The mRNA transcripts of  
404 *UCP2* and its protein levels were reduced in human PE placentae (Fig 9A and C).

405

406 **Discussion**

407 PE has been suggested as a mitochondrial disorder since the late 1980s(Torbergson et  
408 al., 1989). Proteome analysis of PE placentae revealed that the abnormal expression  
409 levels of the respiratory complex proteins were associated with excessive generation of  
410 ROS in the mitochondrial respiratory chain(Shi et al., 2013). Given that mitochondrial  
411 ROS is an important contributor to oxidative stress and inflammation, the reason  
412 causing placental mitochondrial ROS is critical and remains to be revealed. This study  
413 uncovers a novel understanding of placental oxidative stress in PE that Rnd3-mediated  
414 PPAR $\gamma$ /UCP2 cascade participating in the regulation of mitochondrial dysfunction.

415

416 In the pathological condition of PE, Rnd3 promotes the proliferation and migration of  
417 trophoblasts under the regulations by lncRNAs HOXA11-AS and TUG1(Xu et al., 2017;  
418 Xu et al., 2018). In contrast to these observations, Rnd3 has also been proposed as a  
419 stimulator of trophoblast cell invasion in PE, under the repression caused by miR-182-  
420 5p(Fang et al., 2018). However, the expression levels of Rnd3 in PE patients were not  
421 detected in these studies. Our study confirmed the regulatory role of Rnd3 in PE, and  
422 revealed the novel function of Rnd3 in maintaining mitochondrial respiratory chain.  
423 The supply of Rnd3 in PE patient-derived primary trophoblasts significantly improved  
424 mitochondrial function and repressed oxidative stress (Fig 8), suggesting the potential  
425 role of Rnd3 as a pharmacological target for PE. Reductions in *Rnd3* mRNA and protein

426 levels were observed in human PE placentae, while the exact mechanism of Rnd3  
427 downregulation in PE remains to be revealed in the future. The understanding of the  
428 pathological consequence of Rnd3 downregulation is important and has considerable  
429 clinical significance.

430

431 UCP2 exerts protective properties against oxidative damage by reducing ROS  
432 generation via decreasing mitochondrial proton gradient and local oxygen  
433 availability(Cadenas, 2018). PPAR $\gamma$  and its ligands directly activate *UCP2* gene  
434 promoter via the E-box element(Medvedev et al., 2001). By recovering the  
435 mitochondrial membrane potential and reducing ROS generation, PPAR $\gamma$  improves the  
436 survival of trophoblast cells under hypoxic condition(Kohan-Ghadr et al., 2019). In the  
437 present study, reduced PPAR $\gamma$ /UCP2 signaling was detected in human PE placentas,  
438 contributing to mitochondrial defect and oxidative stress in PE primary trophoblasts.  
439 However, excessive stimulation of PPAR $\gamma$ /UCP2 has also been implicated in  
440 pathological placenta with maternal nutrient restriction, by enhancing fatty acid  
441 metabolism and limiting glucose utilization(Yiallourides et al., 2009). Therefore, the  
442 homeostasis of the PPAR $\gamma$ /UCP2 axis is critical in maintaining normal placental  
443 function.

444

445 It is interesting to note that Rnd3 facilitates the protein accumulation of PPAR $\gamma$  without  
446 causing the change of PPAR $\gamma$  mRNA transcripts. Therefore, immunoprecipitation was  
447 performed to investigate the underlying mechanism, and the direct interaction of protein  
448 molecules of RND3 and PPAR $\gamma$  was observed. Meanwhile, the co-localization of the  
449 two proteins was visualized in nuclei and cytoplasm (Fig 6G). Given that the dynamics  
450 of PPAR $\gamma$  depends on ligand-induced transcriptional activation and ubiquitin-  
451 proteasome dependent degradation, it is reasonable that Rnd3 may stabilize PPAR $\gamma$  in  
452 a post-translational manner.

453

454 The present study has several limitations. First, even though we have used two cell  
455 models, including PE primary cell and transform BeWo cell line, to mimic the Rnd3

456 downregulation in the placentas from PE patients. It is not precisely clear whether Rnd3  
457 deficiency could cause PE *in vivo*. Future studies using *Rnd3* gene knockout animal  
458 model will provide stronger supports to the role of Rnd3 in PE etiology. Second, even  
459 though we have proved the direct interaction of RND3 and PPAR $\gamma$  protein molecules,  
460 however, the more precise mechanism of post-translational regulation also needs  
461 further investigation.

462

### 463 **Conclusions**

464 We identified here downregulation of Rnd3 in placental trophoblasts in patients with  
465 PE, and proved that Rnd3 deficiency can cause mitochondrial defects and oxidative  
466 stress in trophoblasts. Supply of Rnd3 in PE primary trophoblasts attenuated  
467 mitochondrial dysfunction and oxidative stress. The possible underlying mechanism is  
468 that Rnd3 interacts with PPAR $\gamma$  and stabilizes PPAR $\gamma$  protein, causing stimulation of  
469 PPAR $\gamma$ /UCP2 cascade. In conclusion, our study indicates the novel role of Rnd3,  
470 providing new insights into PE aetiology.

471

### 472 **Disclosure of interests**

473 None.

### 474 **Contribution to authorship**

475 X.Y. designed the experiments; L.H., Y.M. and X.Y. conducted most experiments; L.C.  
476 collected data in Fig. 9; Y.S., X.C., F.S., L.X., J.C., Y.L., C.Y. and X.Y. analyzed the  
477 data; X.Y. wrote the manuscript; J.C., M.Z., Z.W. and X.Y. revised the manuscript. All  
478 authors contributed to the final manuscript.

479

### 480 **Details of ethics approval**

481 Human placental tissues were obtained and used for the present study with written  
482 patient-informed consent and approval by the Ethics Committee of Southern Hospital,  
483 Southern Medical University. The date of approval is July 14<sup>th</sup>, 2020. The reference  
484 number of approval is NFEC-2020-155.

485



486

## Funding

487 This study was supported by the following funding sources: the Major Science and  
488 Technology Program of Hainan Province (ZDKJ2017007), the National Natural  
489 Science Foundation of China (81771609, 81601317, 81960283, and 81971415), the  
490 Natural Science Foundation of Guangdong Province (2017A030313584,  
491 2019A1515010290 and 2019A1515010019), the Special Fund for Cooperative  
492 Innovation and Platform Environment Construction (2015B050501006), the  
493 Outstanding Youth Development Scheme of Nanfang Hospital Southern Medical  
494 University (2018J010).

495

496

497

## References

498

- 499 **Barak, Y., Liao, D., He, W., Ong, E. S., Nelson, M. C., Olefsky, J. M., Boland, R. and Evans, R. M.**  
500 (2002). Effects of peroxisome proliferator-activated receptor delta on placentation,  
501 adiposity, and colorectal cancer. *Proc Natl Acad Sci U S A* **99**, 303-308.
- 502 **Barak, Y., Nelson, M. C., Ong, E. S., Jones, Y. Z., Ruiz-Lozano, P., Chien, K. R., Koder, A. and**  
503 **Evans, R. M.** (1999). PPAR gamma is required for placental, cardiac, and adipose tissue  
504 development. *Mol Cell* **4**, 585-595.
- 505 **Birben, E., Sahiner, U. M., Sackesen, C., Erzurum, S. and Kalayci, O.** (2012). Oxidative stress and  
506 antioxidant defense. *World Allergy Organ J* **5**, 9-19.
- 507 **Cadenas, S.** (2018). Mitochondrial uncoupling, ROS generation and cardioprotection. *Biochim*  
508 *Biophys Acta Bioenerg* **1859**, 940-950.
- 509 **Corona, J. C. and Duchon, M. R.** (2016). PPARgamma as a therapeutic target to rescue  
510 mitochondrial function in neurological disease. *Free Radic Biol Med* **100**, 153-163.
- 511 **D'Souza, V., Rani, A., Patil, V., Pisal, H., Randhir, K., Mehendale, S., Wagh, G., Gupte, S. and**  
512 **Joshi, S.** (2016). Increased oxidative stress from early pregnancy in women who develop  
513 preeclampsia. *Clin Exp Hypertens* **38**, 225-232.
- 514 **Dai, Y., Song, J., Li, W., Yang, T., Yue, X., Lin, X., Yang, X., Luo, W., Guo, J., Wang, X., et al.**  
515 (2019). RhoE Fine-Tunes Inflammatory Response in Myocardial Infarction. *Circulation* **139**,  
516 1185-1198.
- 517 **Fang, Y. N., Huang, Z. L., Li, H., Tan, W. B., Zhang, Q. G., Wang, L. and Wu, J. L.** (2018). Highly  
518 expressed miR-182-5p can promote preeclampsia progression by degrading RND3 and  
519 inhibiting HTR-8/SVneo cell invasion. *Eur Rev Med Pharmacol Sci* **22**, 6583-6590.
- 520 **Hladunewich, M., Karumanchi, S. A. and Lafayette, R.** (2007). Pathophysiology of the clinical  
521 manifestations of preeclampsia. *Clin J Am Soc Nephrol* **2**, 543-549.
- 522 **Janani, C. and Ranjitha Kumari, B. D.** (2015). PPAR gamma gene--a review. *Diabetes Metab*  
523 *Syndr* **9**, 46-50.

- 524 **Kohan-Ghadr, H. R., Kilburn, B. A., Kadam, L., Johnson, E., Kolb, B. L., Rodriguez-Kovacs, J.,**  
525 **Hertz, M., Armant, D. R. and Drewlo, S.** (2019). Rosiglitazone augments antioxidant  
526 response in the human trophoblast and prevents apoptosisdagger. *Biol Reprod* **100**, 479-  
527 494.
- 528 **Lin, X., Liu, B., Yang, X., Yue, X., Diao, L., Wang, J. and Chang, J.** (2013). Genetic deletion of Rnd3  
529 results in aqueductal stenosis leading to hydrocephalus through up-regulation of Notch  
530 signaling. *Proc Natl Acad Sci U S A* **110**, 8236-8241.
- 531 **Liu, B., Lin, X., Yang, X., Dong, H., Yue, X., Andrade, K. C., Guo, Z., Yang, J., Wu, L., Zhu, X., et**  
532 **al.** (2015). Downregulation of RND3/RhoE in glioblastoma patients promotes  
533 tumorigenesis through augmentation of notch transcriptional complex activity. *Cancer*  
534 *Med* **4**, 1404-1416.
- 535 **McCarthy, F. P., Drewlo, S., Kingdom, J., Johns, E. J., Walsh, S. K. and Kenny, L. C.** (2011).  
536 Peroxisome proliferator-activated receptor-gamma as a potential therapeutic target in  
537 the treatment of preeclampsia. *Hypertension* **58**, 280-286.
- 538 **Medvedev, A. V., Snedden, S. K., Raimbault, S., Ricquier, D. and Collins, S.** (2001).  
539 Transcriptional regulation of the mouse uncoupling protein-2 gene. Double E-box motif  
540 is required for peroxisome proliferator-activated receptor-gamma-dependent activation.  
541 *J Biol Chem* **276**, 10817-10823.
- 542 **Moses, E., Johnson, M., East, C., Dyer, T., Roten, L., Proffitt, J., Fenstad, M., Aalto-Viljakainen,**  
543 **T., Makikallio, K., Heinonen, S., et al.** (2012). OS077. The chromosome 2q22  
544 preeclampsia susceptibility locus reveals shared novel risk factors for CVD. *Pregnancy*  
545 *Hypertens* **2**, 219-220.
- 546 **Myatt, L.** (2010). Review: Reactive oxygen and nitrogen species and functional adaptation of the  
547 placenta. *Placenta* **31 Suppl**, S66-69.
- 548 **Rana, S., Lemoine, E., Granger, J. P. and Karumanchi, S. A.** (2019). Preeclampsia:  
549 Pathophysiology, Challenges, and Perspectives. *Circ Res* **124**, 1094-1112.
- 550 **Salgado, S. S. and Salgado, M. K. R.** (2011). Structural changes in pre-eclamptic and eclamptic  
551 placentas--an ultrastructural study. *J Coll Physicians Surg Pak* **21**, 482-486.
- 552 **San Juan-Reyes, S., Gomez-Olivan, L. M., Islas-Flores, H. and Dublan-Garcia, O.** (2020).  
553 Oxidative stress in pregnancy complicated by preeclampsia. *Arch Biochem Biophys* **681**,  
554 108255.
- 555 **Sanchez-Aranguren, L. C., Prada, C. E., Riano-Medina, C. E. and Lopez, M.** (2014). Endothelial  
556 dysfunction and preeclampsia: role of oxidative stress. *Front Physiol* **5**, 372.
- 557 **Schaiff, W. T., Carlson, M. G., Smith, S. D., Levy, R., Nelson, D. M. and Sadovsky, Y.** (2000).  
558 Peroxisome proliferator-activated receptor-gamma modulates differentiation of human  
559 trophoblast in a ligand-specific manner. *J Clin Endocrinol Metab* **85**, 3874-3881.
- 560 **Shi, Z., Long, W., Zhao, C., Guo, X., Shen, R. and Ding, H.** (2013). Comparative proteomics  
561 analysis suggests that placental mitochondria are involved in the development of pre-  
562 eclampsia. *PLoS One* **8**, e64351.
- 563 **Stegers, E. A., von Dadelszen, P., Duvekot, J. J. and Pijnenborg, R.** (2010). Pre-eclampsia.  
564 *Lancet* **376**, 631-644.
- 565 **Torbergson, T., Oian, P., Mathiesen, E. and Borud, O.** (1989). Pre-eclampsia--a mitochondrial  
566 disease? *Acta Obstet Gynecol Scand* **68**, 145-148.
- 567 **Vishnyakova, P. A., Volodina, M. A., Tarasova, N. V., Marey, M. V., Tsvirkun, D. V., Vavina, O.**

- 568 V., Khodzhaeva, Z. S., Kan, N. E., Menon, R., Vysokikh, M. Y., et al. (2016). Mitochondrial  
569 role in adaptive response to stress conditions in preeclampsia. *Sci Rep* **6**, 32410.
- 570 Waite, L. L., Louie, R. E. and Taylor, R. N. (2005). Circulating activators of peroxisome proliferator-  
571 activated receptors are reduced in preeclamptic pregnancy. *J Clin Endocrinol Metab* **90**,  
572 620-626.
- 573 Waite, L. L., Person, E. C., Zhou, Y., Lim, K. H., Scanlan, T. S. and Taylor, R. N. (2000). Placental  
574 peroxisome proliferator-activated receptor-gamma is up-regulated by pregnancy serum.  
575 *J Clin Endocrinol Metab* **85**, 3808-3814.
- 576 Wang, Y. and Walsh, S. W. (1998). Placental mitochondria as a source of oxidative stress in pre-  
577 eclampsia. *Placenta* **19**, 581-586.
- 578 Xu, Y., Ge, Z., Zhang, E., Zuo, Q., Huang, S., Yang, N., Wu, D., Zhang, Y., Chen, Y., Xu, H., et al.  
579 (2017). The lncRNA TUG1 modulates proliferation in trophoblast cells via epigenetic  
580 suppression of RND3. *Cell Death Dis* **8**, e3104.
- 581 Xu, Y., Wu, D., Liu, J., Huang, S., Zuo, Q., Xia, X., Jiang, Y., Wang, S., Chen, Y., Wang, T., et al.  
582 (2018). Downregulated lncRNA HOXA11-AS Affects Trophoblast Cell Proliferation and  
583 Migration by Regulating RND3 and HOXA7 Expression in PE. *Mol Ther Nucleic Acids* **12**,  
584 195-206.
- 585 Yang, X., Wang, T., Lin, X., Yue, X., Wang, Q., Wang, G., Fu, Q., Ai, X., Chiang, D. Y., Miyake, C.  
586 Y., et al. (2015). Genetic deletion of Rnd3/RhoE results in mouse heart calcium leakage  
587 through upregulation of protein kinase A signaling. *Circ Res* **116**, e1-e10.
- 588 Yiallourides, M., Sebert, S. P., Wilson, V., Sharkey, D., Rhind, S. M., Symonds, M. E. and Budge,  
589 H. (2009). The differential effects of the timing of maternal nutrient restriction in the ovine  
590 placenta on glucocorticoid sensitivity, uncoupling protein 2, peroxisome proliferator-  
591 activated receptor-gamma and cell proliferation. *Reproduction* **138**, 601-608.
- 592 Yue, X., Lin, X., Yang, T., Yang, X., Yi, X., Jiang, X., Li, X., Li, T., Guo, J., Dai, Y., et al. (2016).  
593 Rnd3/RhoE Modulates Hypoxia-Inducible Factor 1alpha/Vascular Endothelial Growth  
594 Factor Signaling by Stabilizing Hypoxia-Inducible Factor 1alpha and Regulates Responsive  
595 Cardiac Angiogenesis. *Hypertension* **67**, 597-605.
- 596 Yue, X., Sun, Y., Zhong, M., Ma, Y., Wei, Y., Sun, F., Xiao, L., Liu, M., Chen, J., Lai, Y., et al. (2018).  
597 Decreased expression of fibroblast growth factor 13 in early-onset preeclampsia is  
598 associated with the increased trophoblast permeability. *Placenta* **62**, 43-49.
- 599 Yue, X., Yang, X., Lin, X., Yang, T., Yi, X., Dai, Y., Guo, J., Li, T., Shi, J., Wei, L., et al. (2014). Rnd3  
600 haploinsufficient mice are predisposed to hemodynamic stress and develop apoptotic  
601 cardiomyopathy with heart failure. *Cell Death Dis* **5**, e1284.

602  
603  
604  
605

606 **Table 1. Clinical characteristics of the PE group and of the healthy control group.**

607

608 **Figure 1. The expression of Rnd3 is downregulated in human placentae with PE.**

609 (A) Representative RND3 protein expression by Western blot analysis. Densitometry  
610 of bands was performed by Image J. (B) Relative levels of Rnd3 mRNA from 30 human  
611 healthy placentae and 24 human placentae with PE.

612

613 **Figure 2. Decreased Rnd3 expression levels are associated with severe oxidative**

614 **stress and apoptosis in PE patient derived-human primary trophoblasts. (A)**

615 Severe oxidative stress was observed in human placental tissue sections from PE

616 patients by DHE staining. The nuclei were visualized by blue DAPI staining. Scale bar

617 represents 200  $\mu\text{m}$ . **(B)** Isolated human primary trophoblast cells (PTBs) were identified

618 by the cell surface marker CK7 shown in red and the nuclei were visualized by DAPI.

619 The purity of primary trophoblasts was calculated by the ratio of CK7-positive cells

620 over nuclei. The scale bar represents 50  $\mu\text{m}$ . **(C)** RND3 protein expression in PTBs was

621 labeled by immunostaining. Decreased Rnd3 expression along with increased ROS

622 levels were observed in the PTBs from PE patients. The scale bar represents 5  $\mu\text{m}$ . **(D)**

623 Elevated ROS levels and severe apoptosis were observed in the PE PTBs compared

624 with those of the PTBs from healthy control subjects. ROS was labeled by DHE staining

625 shown in red. The arrows point at the TUNEL-positive cells (green), which overlapped

626 with nuclear counter-staining (blue). The scale bar represents 40  $\mu\text{m}$ .

627

628 **Figure 3. Abnormal mitochondria were observed in the human placental**

629 **trophoblasts with PE. (A)** Placental tissues from PE patients and healthy control

630 subjects were analyzed by transmission electron microscopy and viewed at a low

631 magnification (upper panel) and a high magnification (lower panel), respectively. The

632 arrows point at the damaged mitochondria. The scale bars represent 1  $\mu\text{m}$  and 0.5  $\mu\text{m}$ ,

633 respectively. **(B)** Mitochondrial membrane potentials were shown by the JC1 staining

634 of the primary trophoblast cells isolated from PE patients and healthy control subjects

635 with or without hypoxic cell culture. JC1 is a cell permeable dye that accumulates in

636 mitochondria and yields green fluorescence. Driven by high mitochondrial membrane

637 potential, JC1 is able to enter the mitochondrial inner membrane and yield red

638 fluorescence. The ratios of the red/green fluorescence intensities were quantified by the

639 image J software. The numbers in the columns represent the numbers of cells in each

640 group. C-PTBs indicates control-primary trophoblasts, and P-PTBs indicates PE-

641 primary trophoblasts.

642

643 **Figure 4. Rnd3 represses the hypoxia-induced ROS generation and apoptosis in**

644 **trophoblastic BeWo cells. (A)** Reduced ROS levels were observed in hypoxic

645 conditions and were challenged with GFP-Rnd3 overexpressing BeWo cells. ROS was

646 labeled by DHE staining shown in red. The arrows point at the GFP-Rnd3 expressing

647 cells. The scale bar represents 80  $\mu\text{m}$ . **(B)** A decrease in 8-isoprostane levels was

648 detected in the cell lysates of myc-Rnd3 overexpressing BeWo cells, compared with

649 those noted in the myc control group. The experiments were repeated 3 times. **(C)** The

650 comparison of the TUNEL staining in myc and myc-Rnd3 overexpressing BeWo cells

651 following 16 h of hypoxic cell culture. The arrows indicate TUNEL-positive cells

652 (green) overlapping with nuclear counter-staining. The scale bar represents 200  $\mu\text{m}$ . **(D)**

653 Quantification of TUNEL-positive cells. The experiments were repeated 3 times.

654

655 **Figure 5. Rnd3 deficiency results in mitochondrial dysfunction. (A)** By

656 transmission electron microscope analysis, mitochondrial damage was observed in  
657 siRnd3 transiently transfected BeWo cells. The arrow heads indicate the loss of crista  
658 in the damaged mitochondria. The images of a series of magnifications are displayed.  
659 **(B)** The depolarized mitochondrial membrane potential was detected in siRnd3  
660 transfected BeWo cells compared with that noted in the siCtrl group. The mitochondrial  
661 membrane potential was quantified by the ratios of red/green fluorescence intensities  
662 of mitochondria-specific JC1 dye. **(C)** The Oxygen consumption rate (OCR) of treated  
663 BeWo cells was measured prior to and following the injections of oligomycin, FCCP,  
664 rotenone and antimycin A (Rot/AA), respectively. Increased proton leak was detected  
665 in the siRnd3 group. **(D)** Reduced coupler efficiency was detected in siRnd3 transfected  
666 BeWo cells compared with that noted in the siCtrl group as determined by  
667 mitochondrial OCR determination. The scale bar represents 80  $\mu\text{m}$ . The numbers in the  
668 columns represent the number of cells in each group.

669

670 **Figure 6. RND3 protein interacts with PPAR $\gamma$  and promotes the PPAR $\gamma$ -UCP2**  
671 **cascade. (A)** Increased expression levels of UCP2 and PPAR $\gamma$  were observed following  
672 Rnd3 overexpression. **(B)** Knockdown of Rnd3 results in lower UCP2 and PPAR $\gamma$   
673 protein expression levels. **(C)** Q-PCR analysis indicated that *UCP2* mRNA levels were  
674 increased in myc-Rnd3 expressed cells, whereas they were reduced in Rnd3 deficient  
675 cells. **(D)** Nuclear protein levels of RND3 and PPAR $\gamma$  were increased in the myc-Rnd3  
676 overexpressed cells and were decreased in the Rnd3 deficient cells. **(E)** Rnd3 regulated  
677 PPAR $\gamma$  transcriptional activity as demonstrated by luciferase assays. **(F)** Myc-RND3  
678 physically interacted with flag-PPAR $\gamma$  *in vivo* as determined by coimmunoprecipitation.  
679 **(G)** Immunofluorescence staining indicated the co-localization of PPAR $\gamma$  and RND3  
680 proteins. Knockdown of Rnd3 reduced the nuclear accumulation of the PPAR $\gamma$  protein.  
681 The scale bar represents 100  $\mu\text{m}$ .

682

683 **Figure 7. Rnd3 deficiency-mediated oxidative stress and mitochondrial**  
684 **dysfunction are attenuated by PPAR $\gamma$  overexpression. (A)** JC1 staining was  
685 performed in BeWo cells among the three following groups: siCtrl, siRnd3 and siRnd3  
686 plus flag-PPAR $\gamma$ . The depolarization of the mitochondrial membrane potential caused  
687 by Rnd3 knockdown was attenuated by flag-PPAR $\gamma$  overexpression. The scale bar  
688 represents 80  $\mu\text{m}$ . **(B)** The quantification of the ratios of red/green fluorescence  
689 intensities. The experiments were repeated 3 times. **(C)** Transmission electron  
690 microscope analysis indicates that the Rnd3 deficiency-induced mitochondrial damage  
691 was recovered by flag-PPAR $\gamma$  overexpression. The arrow heads display damaged  
692 mitochondrial structure in the siRnd3 group. The scale bar represents 0.5  $\mu\text{m}$ . **(D)** DHE  
693 staining indicates ROS levels among the three groups. The scale bar represents 100  $\mu\text{m}$ .  
694 **(E)** The ROS levels were quantified by the densitometry of DHE staining. The  
695 experiments were repeated 3 times. **(F)** 8-isoprostane levels were detected in the cell  
696 lysates of the three groups. **(G)** Q-PCR analysis of *UCP2* mRNA levels among the three  
697 groups. The experiments were repeated 3 times. **(H)** Immunoblots revealed increased  
698 UCP2 protein expression levels in the flag-PPAR $\gamma$  rescue group. **(I)** Mitochondrial

699 respiratory function was measured. The proton leak associated OCR was improved by  
700 PPAR $\gamma$ . (J) Rnd3 deficiency-mediated defective coupler efficiency was ameliorated by  
701 PPAR $\gamma$ .

702

703 **Figure 8. Oxidative stress and mitochondrial dysfunction in PE patient-derived**  
704 **PTBs are partially rescued by Rnd3 overexpression.** (A) Human PTBs from PE  
705 patient and healthy control subjects were infected with Ad-GFP-hRnd3. Hypoxic cell  
706 culture was applied to induce oxidative stress. The arrow heads represent the GFP-Rnd3  
707 expressing PTBs (green fluorescence). The long arrows represent the PTBs with non-  
708 GFP-Rnd3. ROS levels were significantly reduced in PE-PTBs following GFP-Rnd3  
709 overexpression as determined by DHE staining. NS indicates non-specific staining. The  
710 scale bar represents 25  $\mu$ m. (B) 8-isoprostane level detection in the C-PTBs and P-PTBs  
711 following treatment of Ad-GFP or Ad-GFP-Rnd3. (C) Ad-GFP-hRnd3 improved *UCP2*  
712 mRNA transcripts in the PTBs. (D) Rnd3 overexpression rescued PPAR $\gamma$ -UCP2  
713 signaling in PE-PTBs. Mitochondrial dysfunction in PE-PTBs was partially rescued by  
714 Ad-GFP-hRnd3, as determined by the increases in proton leak associated OCR (E) and  
715 respiratory control ratio (F). C-PTBs indicates control-primary trophoblasts; P-PTBs,  
716 PE-primary trophoblasts.

717

718 **Figure 9. The downregulation of the PPAR $\gamma$ -UCP2 cascade is confirmed in human**  
719 **placentae with PE.** (A) Representative protein expression levels of PPAR $\gamma$  and UCP2  
720 as determined by western blot analysis. The levels of the two proteins were  
721 downregulated in the placentas with PE. (B) Relative mRNA levels of *PPAR $\gamma$*  from 30  
722 healthy placentae and 24 placentae with PE. (C) Relative mRNA levels of *UCP2* from  
723 30 healthy placentae and 24 placentae with PE.

724

Figure 1

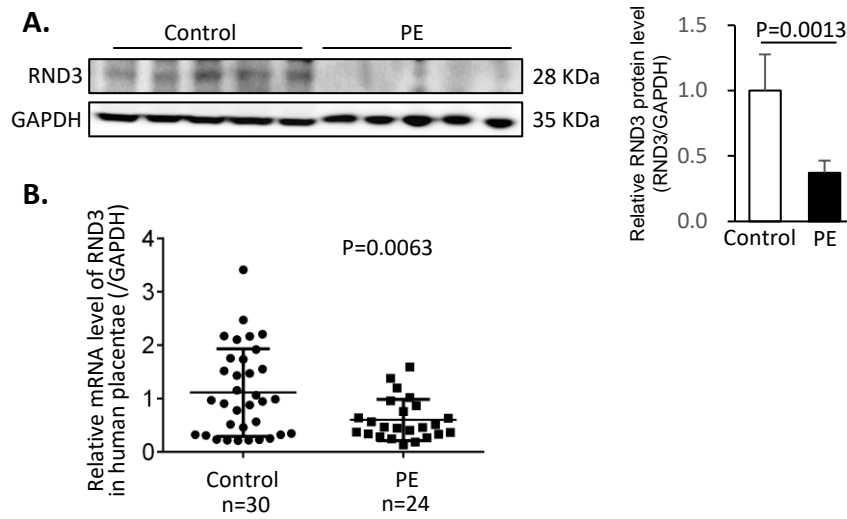

Figure 2

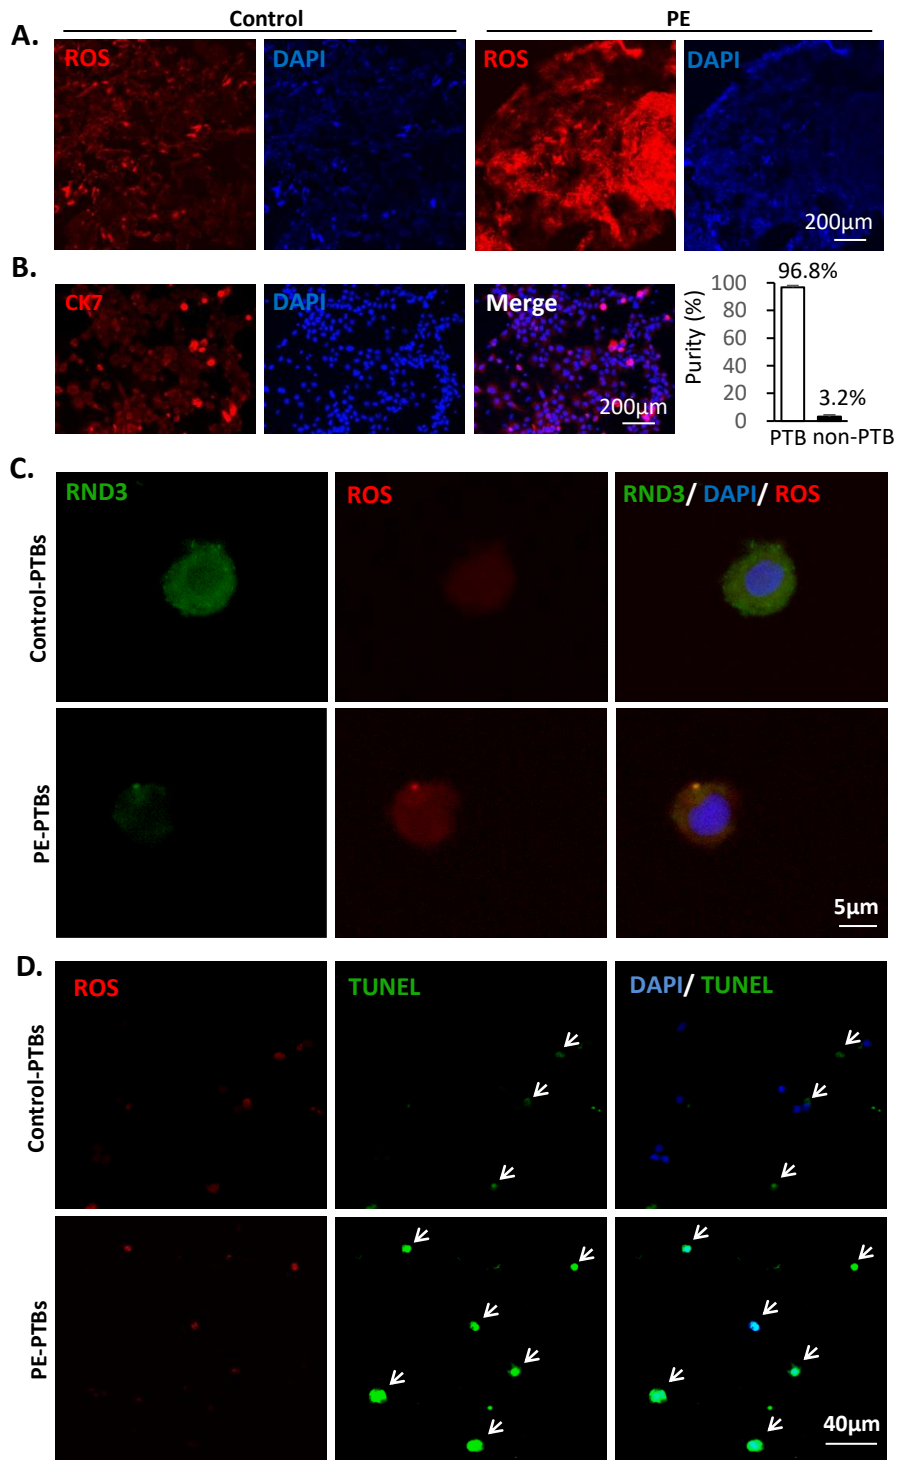



Figure 3

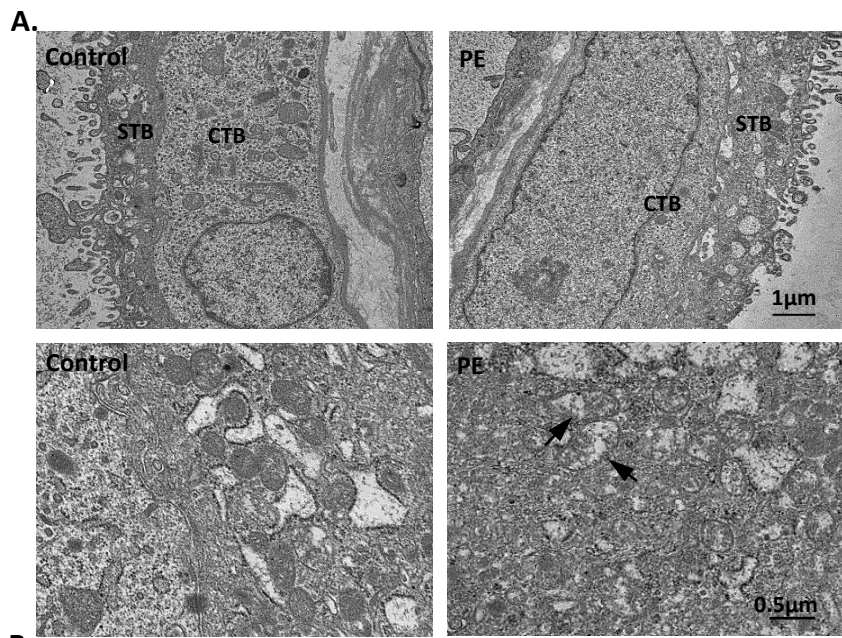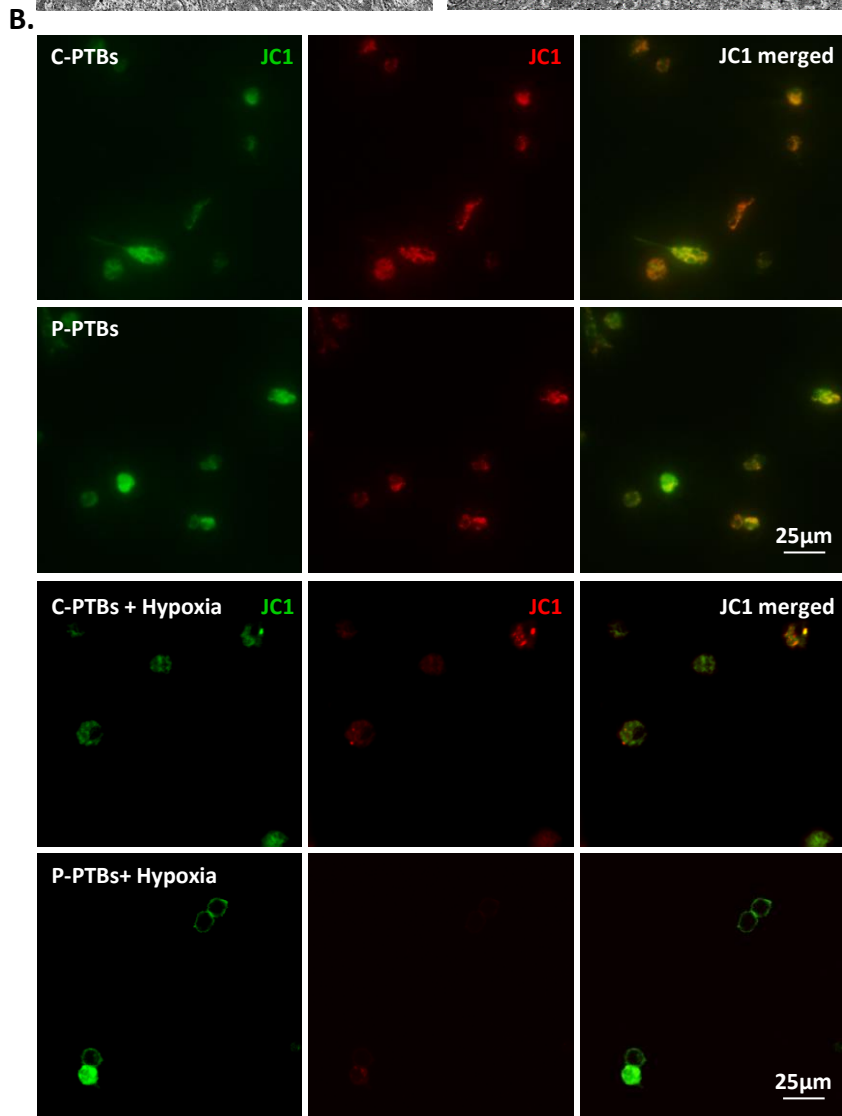

Figure 4

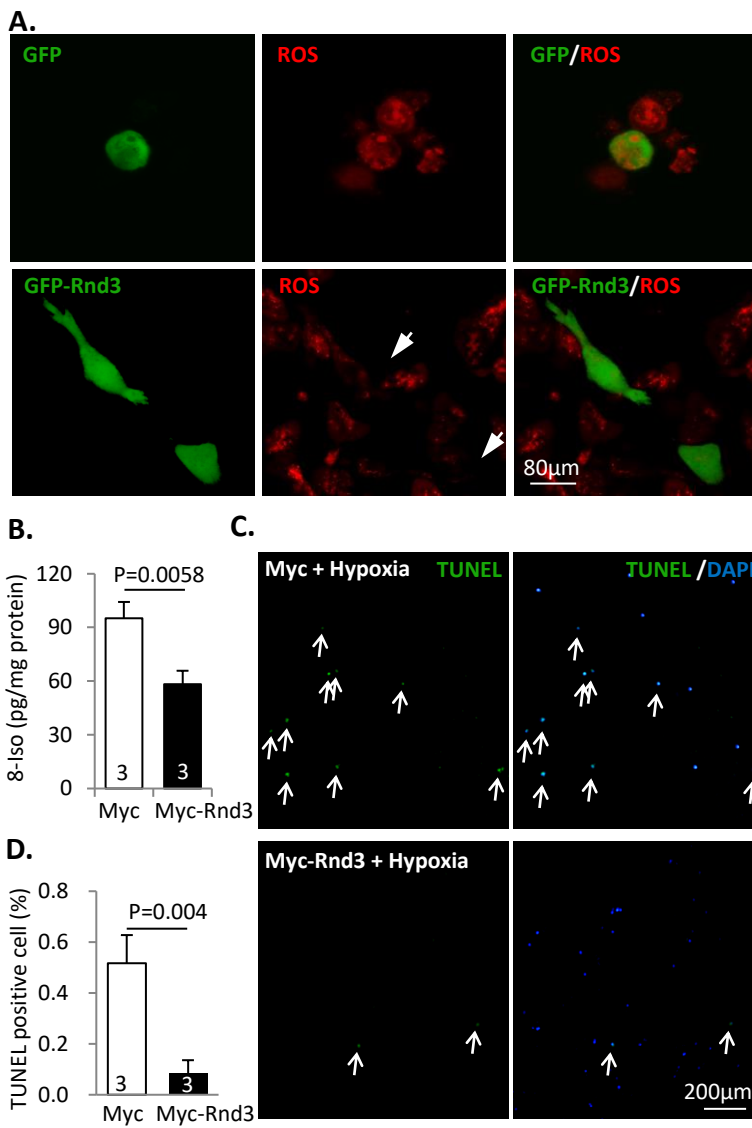

**Figure 5**

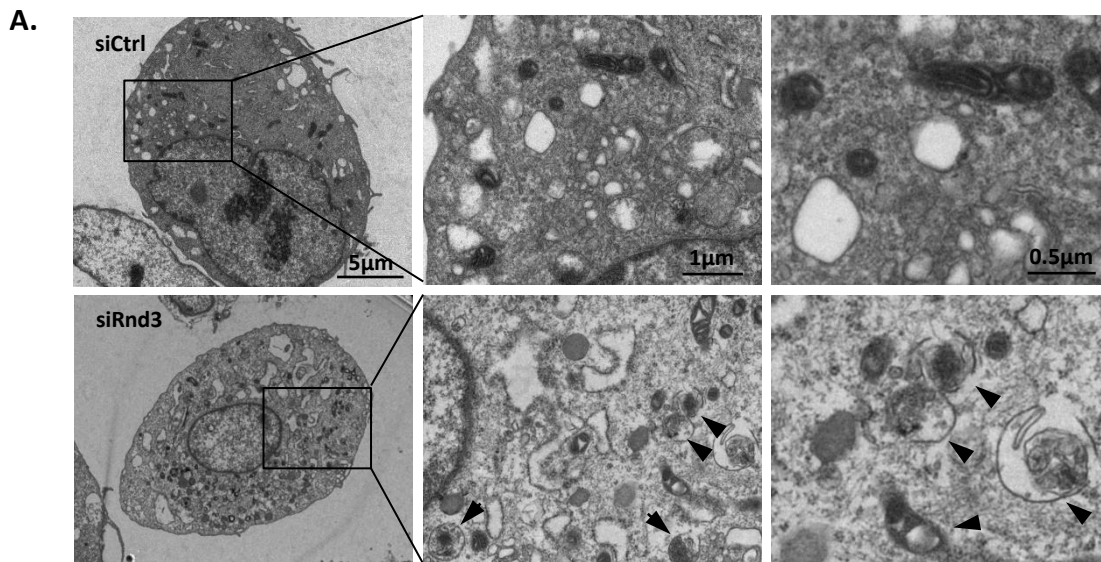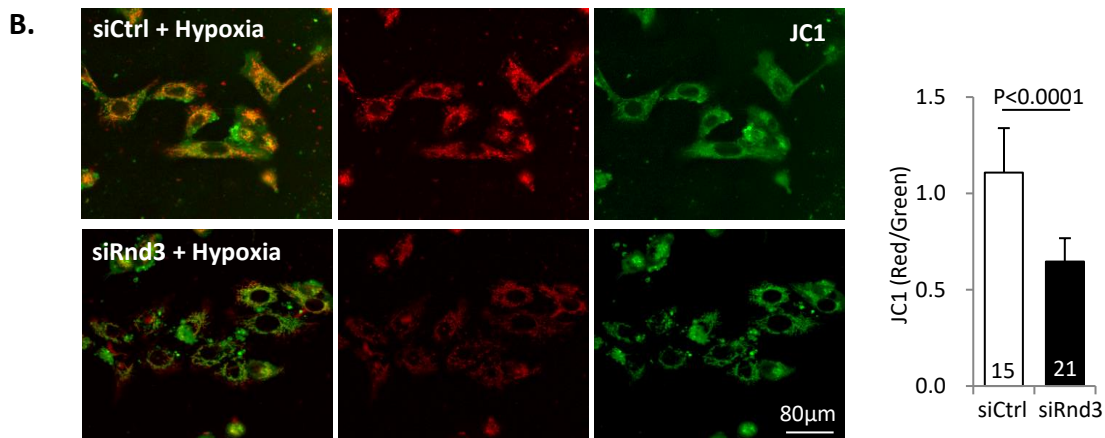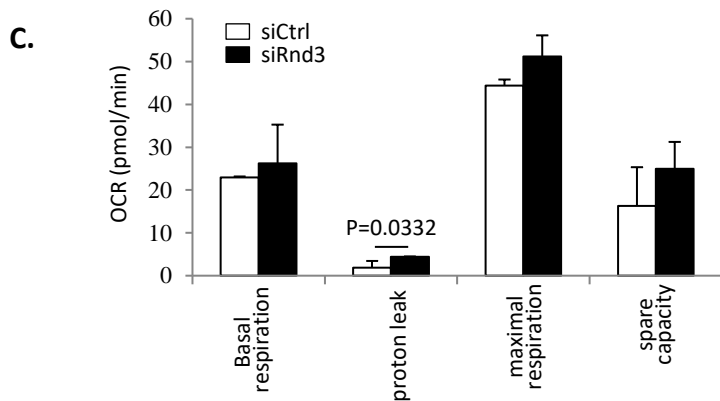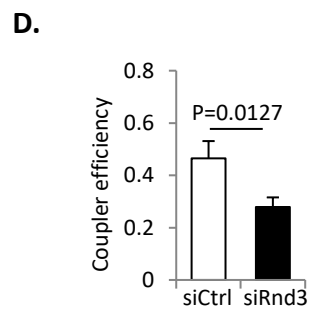

**Figure 6**

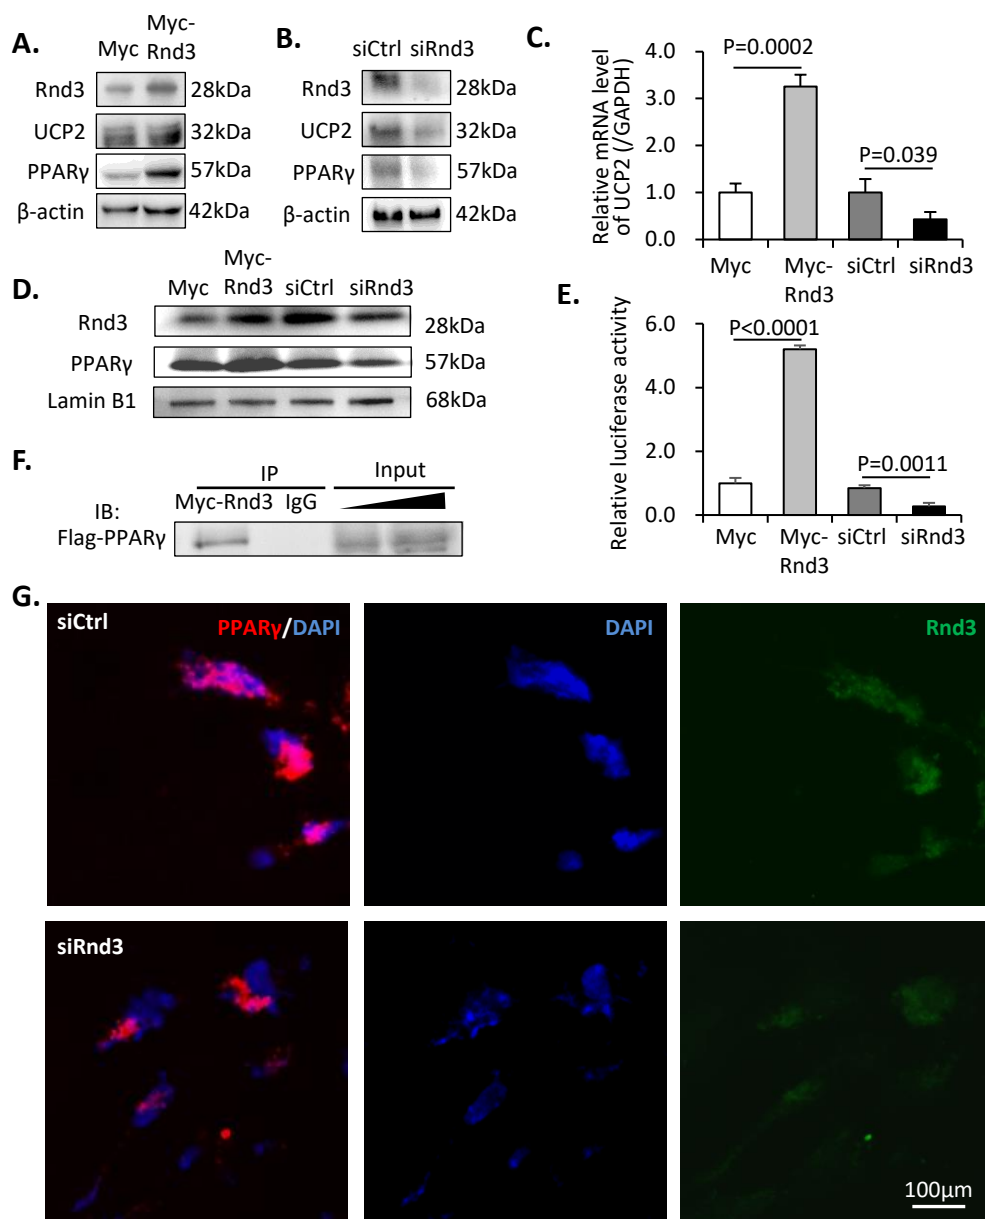

Figure 7

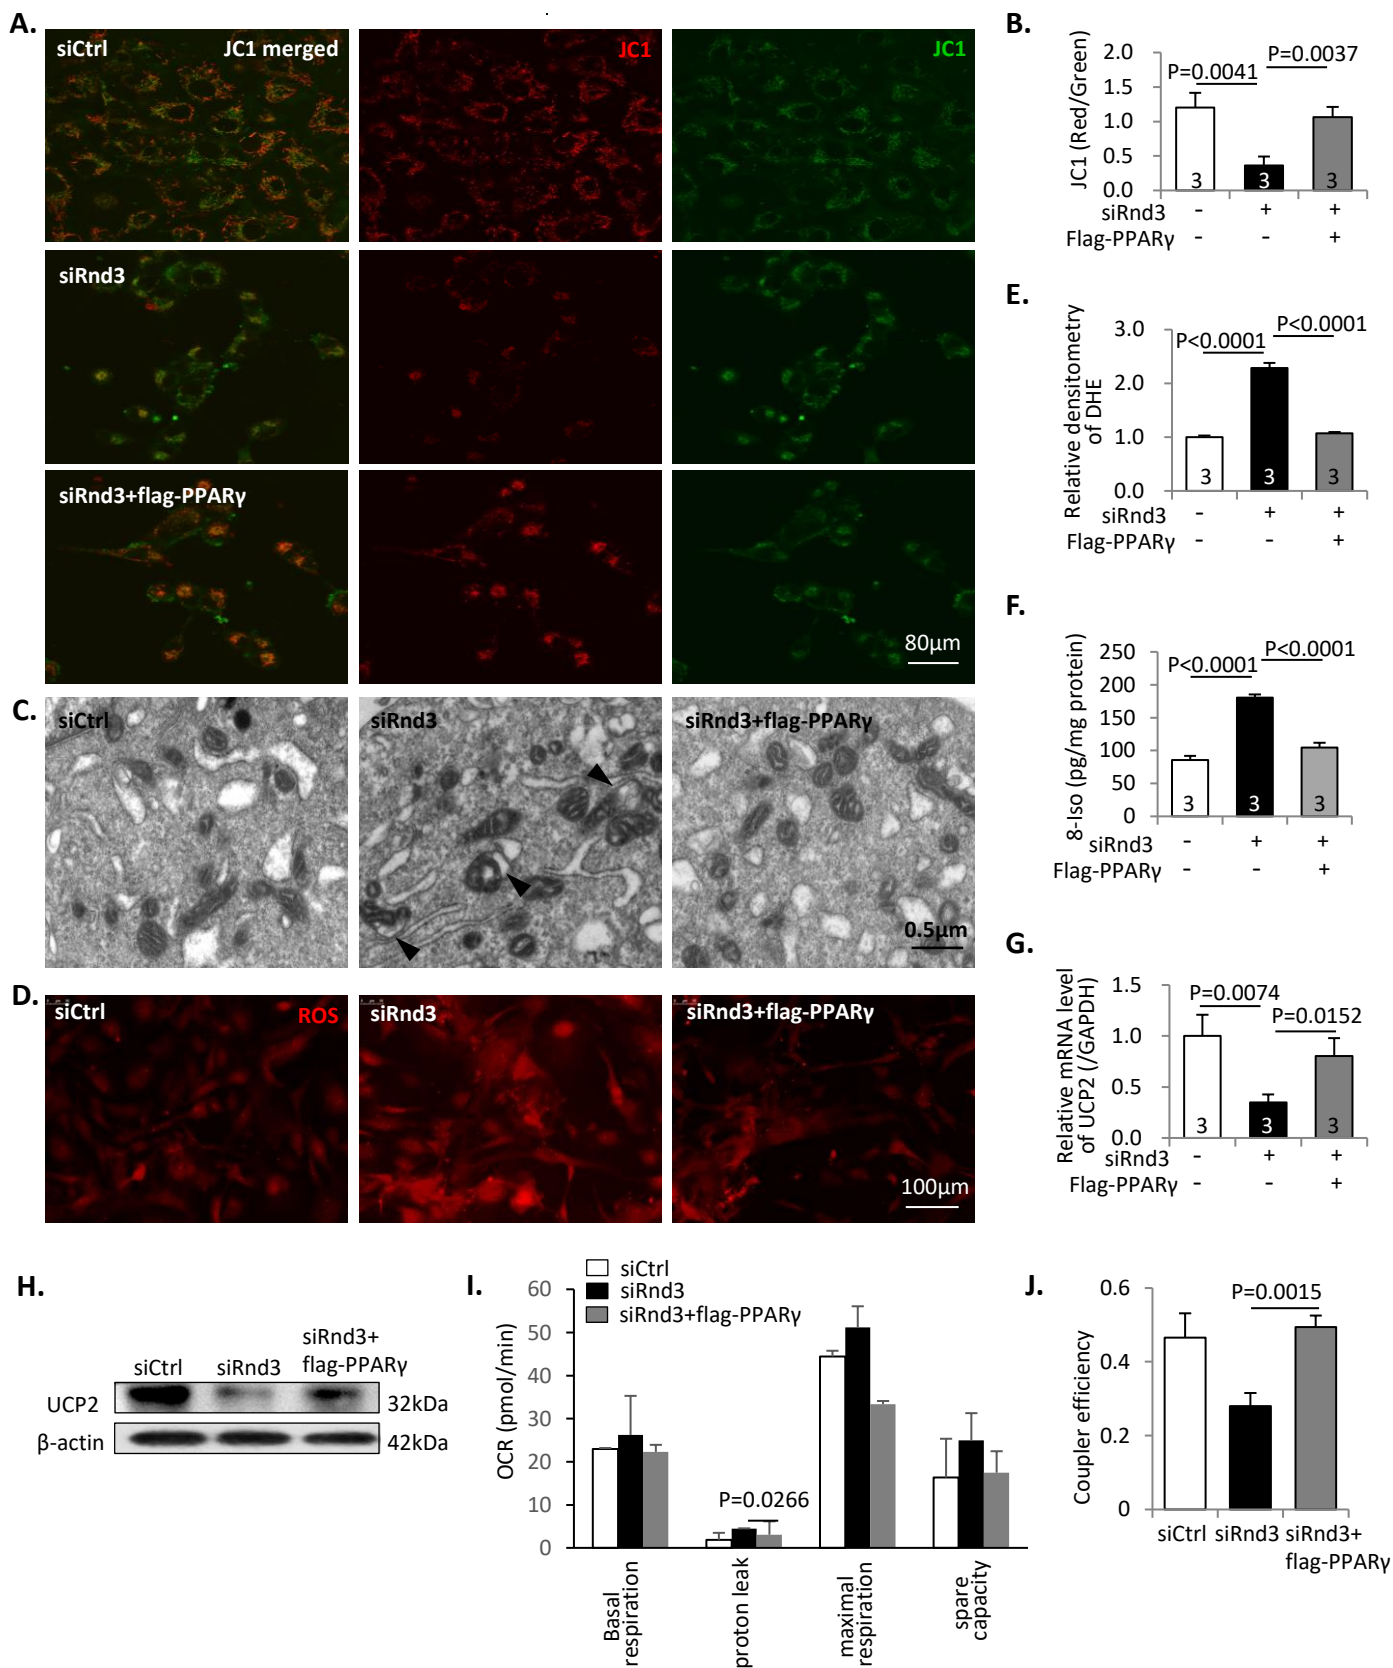

Figure 8

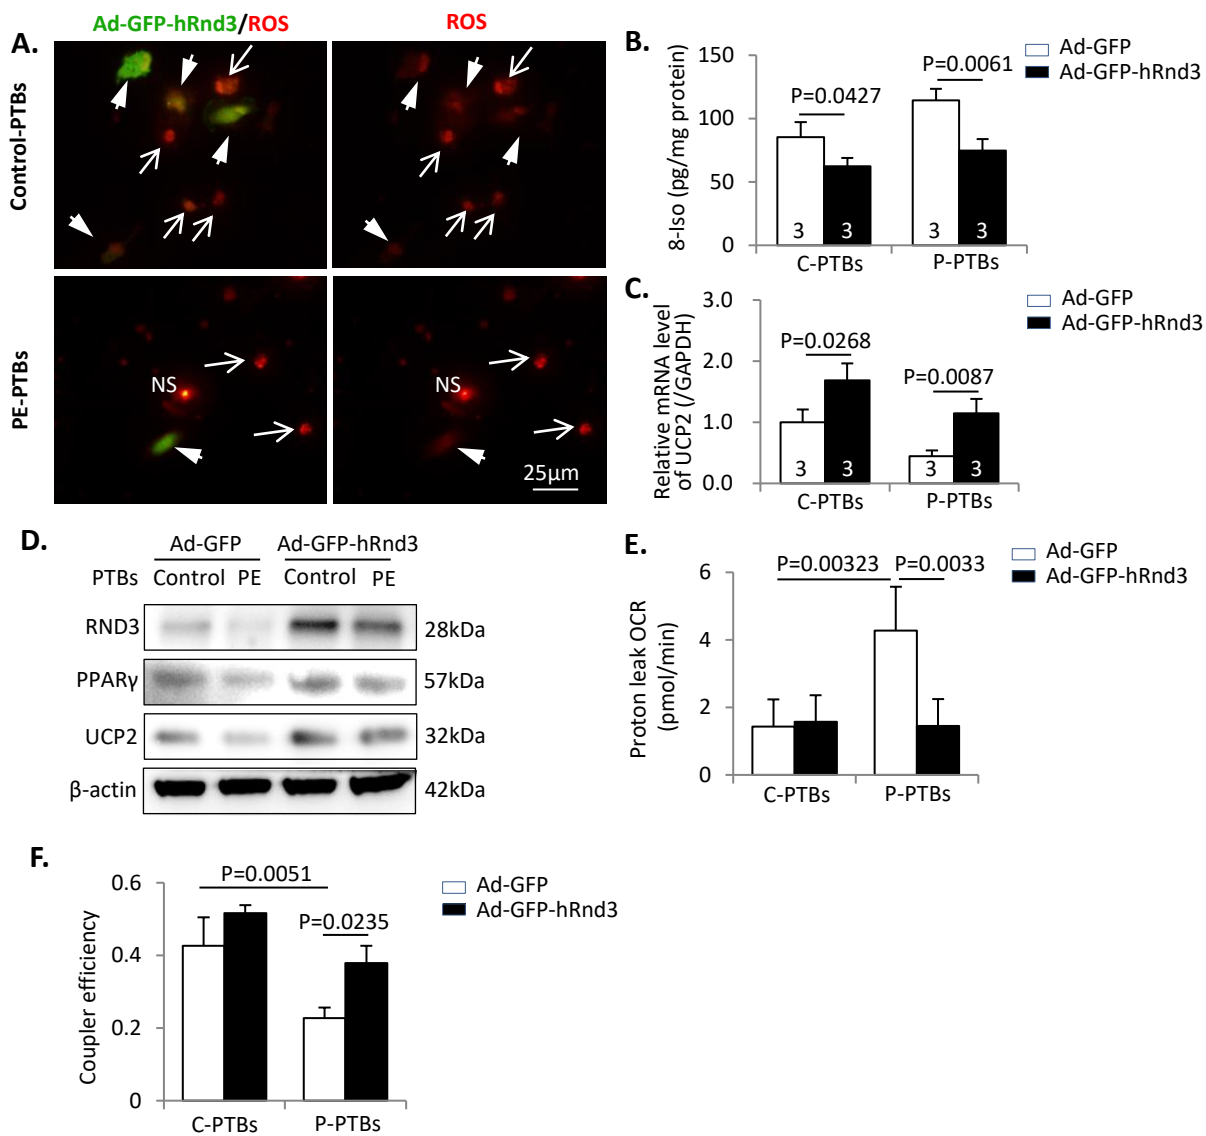

Figure 9

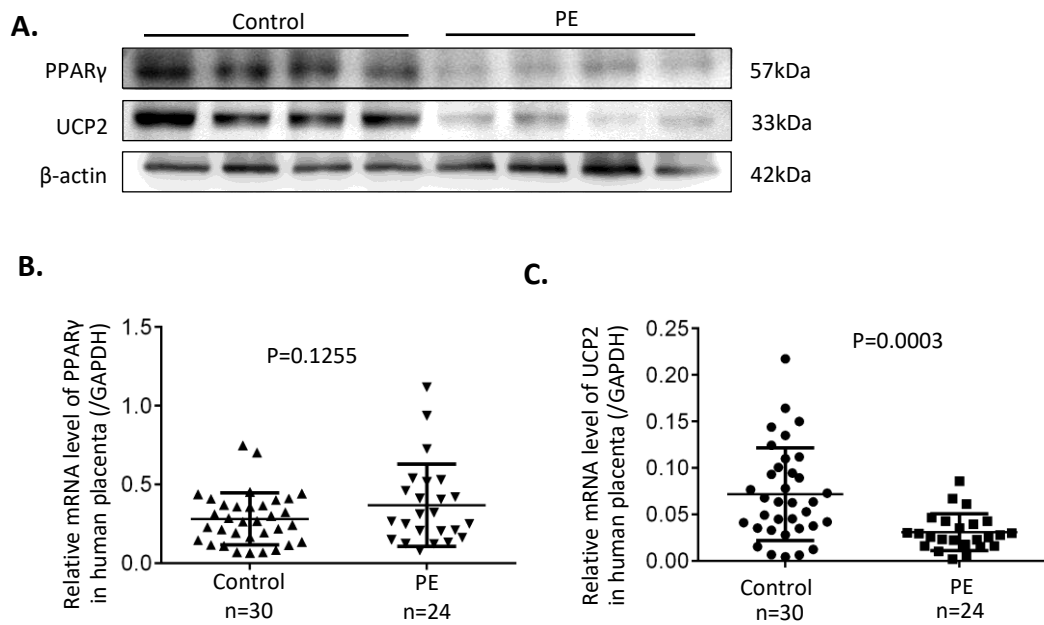

**Table 1**

|                              | <b>PE (n=24)</b> | <b>Control (n=30)</b> | <b>P value (*&lt;0.05)</b> |
|------------------------------|------------------|-----------------------|----------------------------|
| Maternal age (years)         | 29.7 ± 5.9       | 31.1 ± 3.7            | 0.2953                     |
| Gestation weeks at diagnosis | 35.1 ± 3.3       | NA                    | NA                         |
| Gestation weeks at delivery  | 36.1 ± 2.8       | 37.0 ± 1.2            | 0.086                      |
| Neonate birthweight (kg)     | 2.46 ± 0.98      | 3.17 ± 0.50           | 0.0012                     |
| SBP (mm/Hg)                  | 159.0 ± 11.9     | 122.2 ± 9.4           | <0.0001*                   |
| DBP (mm/Hg)                  | 101.1 ± 10.0     | 71.5 ± 5.5            | <0.0001*                   |
| BMI (kg/m <sup>2</sup> )     | 23.1 ± 2.9       | 22.5 ± 2.9            | 0.4999                     |



**Figure S1**

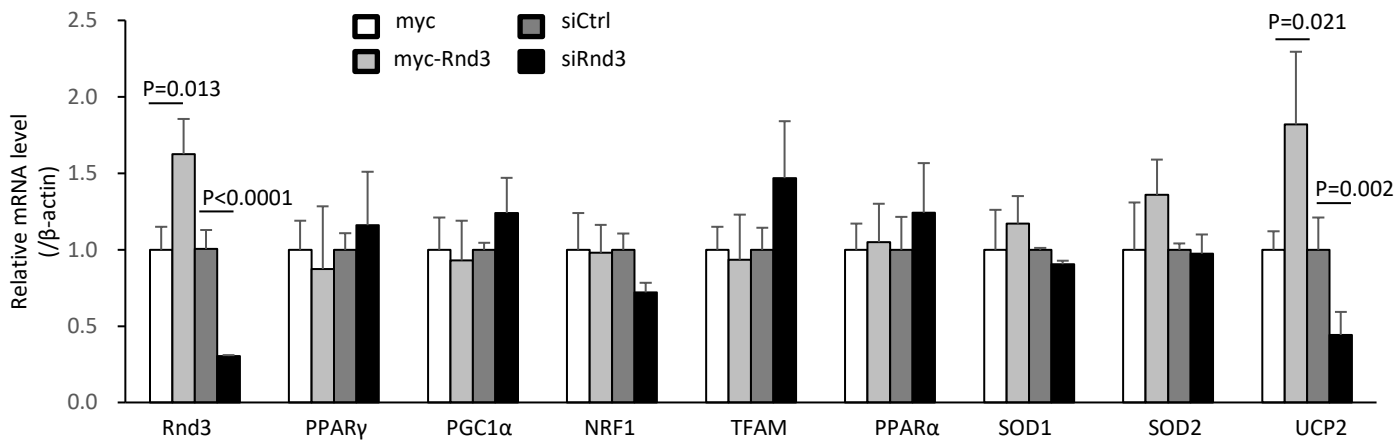

**Figure S1. Relative mRNA expression levels of the mitochondrial genes in BeWo cells.** RND3 promoted *UCP2* mRNA level. Manipulation of RND3 expression resulted in no change in the mRNA levels of *PPAR $\gamma$* , *PGC1 $\alpha$* , *NRF1*, *TFAM*, *PPAR $\alpha$* , *SOD1* and *SOD2*.
